# Supplementary material for: Anacardic Acids from Amphipterygium adstringens Confer Cytoprotection against 5-Fluorouracil and Carboplatin Induced Blood Cell Toxicity While Increasing Antitumoral Activity and Survival in an Animal Model of Breast Cancer
Source: MDPI journal article supplement (doi:10.3390/molecules26113241), 2021-05-28
Supplement: s1 [file s1]

IPN  
4/12/2019

File: M1-EVD2  
Sample: M1-EVD2  
Instrument: JEOL GCmate  
Inlet: Direct Probe

Date Run: 04-12-2019 (Time Run: 12:22:34)

Ionization mode: EI+

Scan: 769

R.T.: 10.28

Base: m/z 304; 4.6%FS TIC: 325408

#Ions: 201

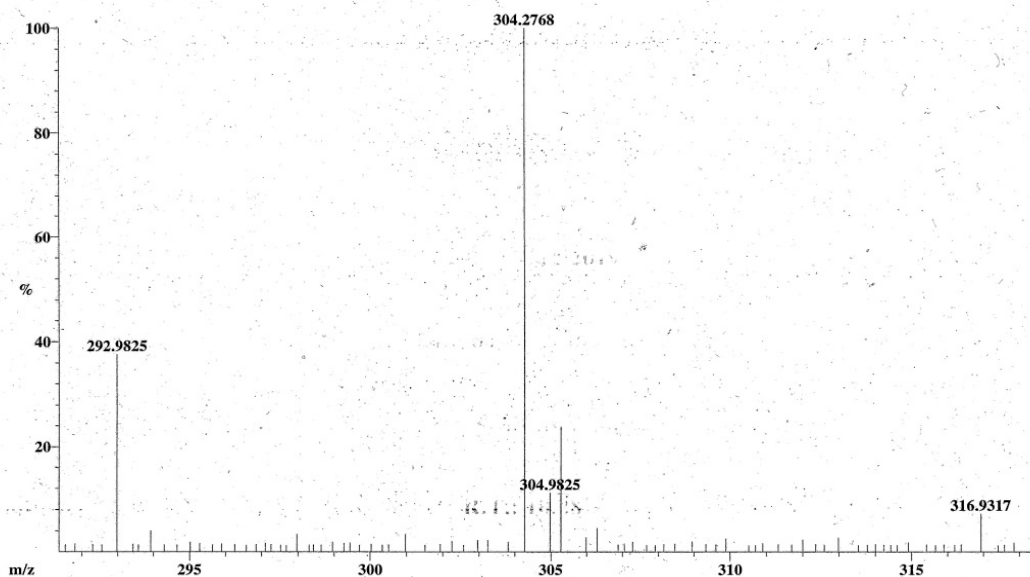

Selected Isotopes :  $H_{0-36}C_{0-21}O_{0-1}$

Error Limit : 5 ppm

| <u>Measured</u><br><u>Mass</u> | <u>% Base</u> | <u>Formula</u>  | <u>Calculated</u><br><u>Mass</u> | <u>Error</u> |
|--------------------------------|---------------|-----------------|----------------------------------|--------------|
| 304.2768                       | 100.0%        | $C_{21}H_{36}O$ | 304.2766                         | 0.6          |

**Supplementary Figure S1. AA characterization.** Mass Spectrum (EI<sup>+</sup>) of fraction 68. Spectral data. Molecular formula was determined as  $C_{22}H_{36}O_3$  by EI<sup>+</sup>-MS, the base peak ( $m/z = 304.2768$ ) represents the loss of a carboxyl group.
